# Supplementary material for: TCF21+ mesenchymal cells contribute to testis somatic cell development, homeostasis, and regeneration in mice
Source: PubMed Central journal article supplement (PMC8222243; doi:10.1038/s41467-021-24130-8), 2021-06-23
Supplement: 41467_2021_24130_MOESM1_ESM.pdf [file 41467_2021_24130_MOESM1_ESM.pdf]

## **Supplementary Figures**

**Tcf21+ mesenchymal cells contribute to testis somatic cell development, homeostasis, and regeneration**

**Shen et al**

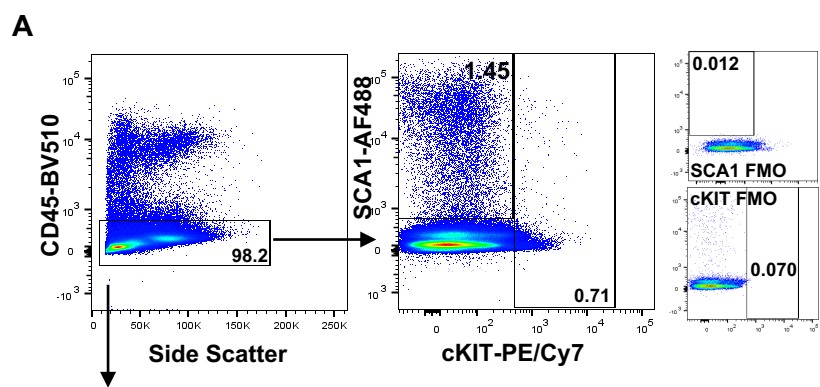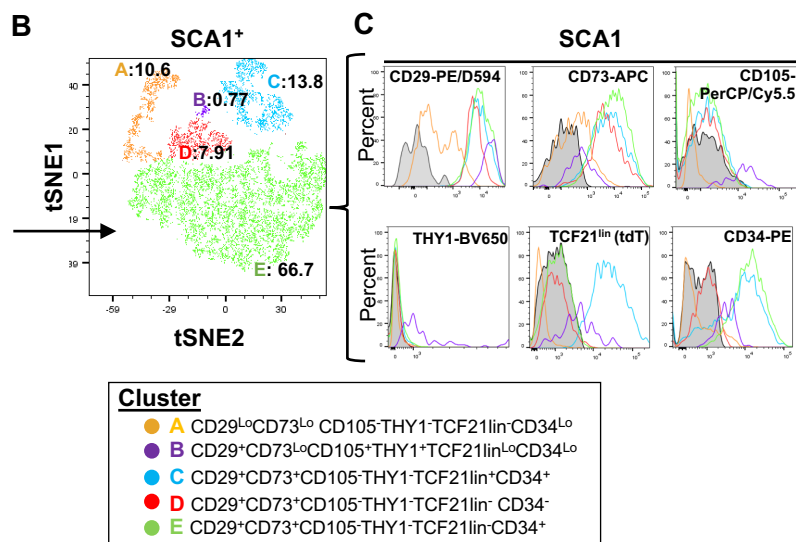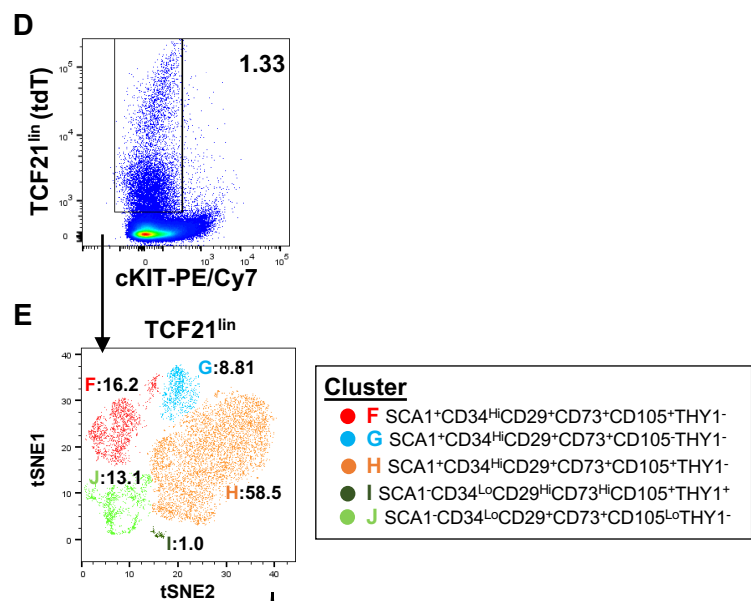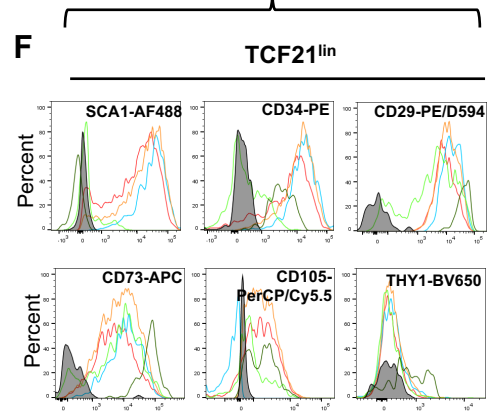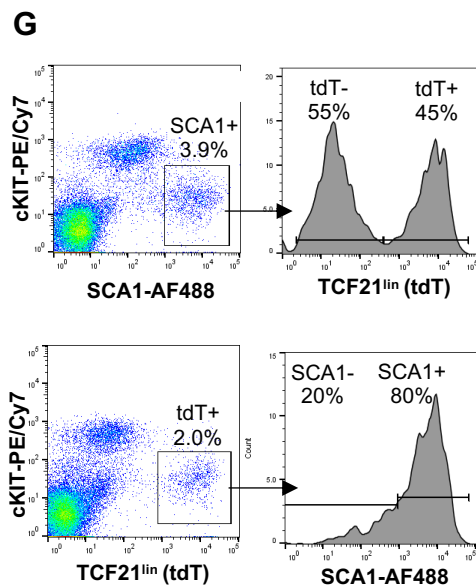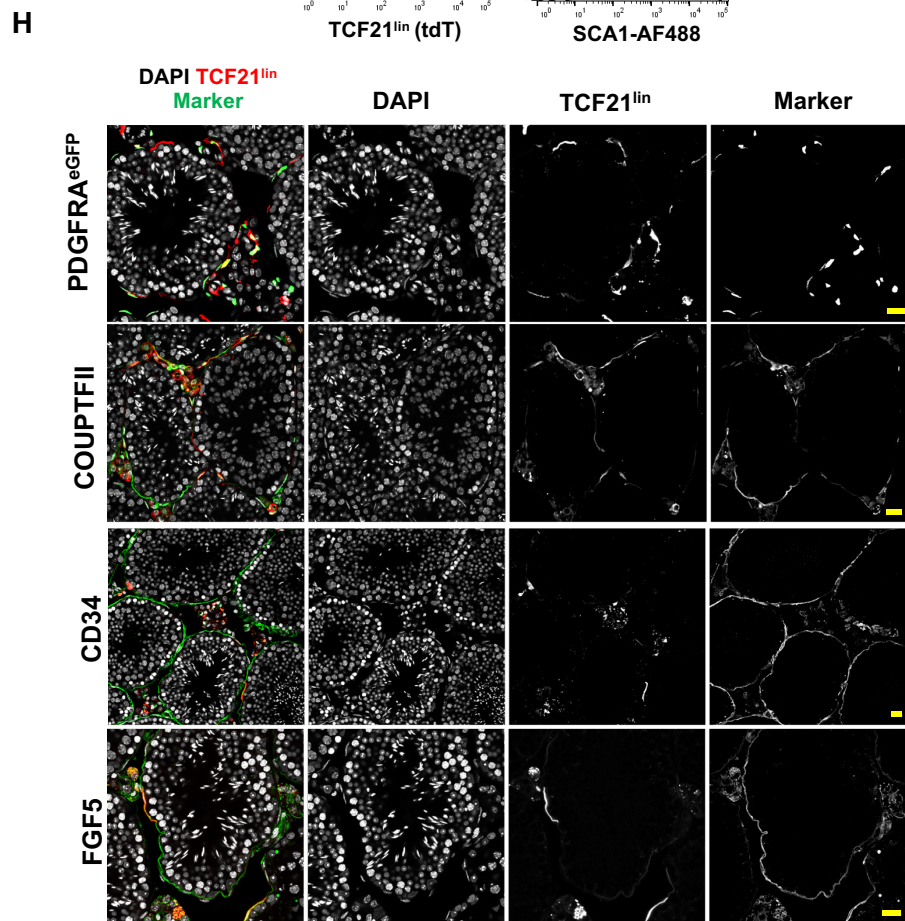

**Supplementary Figure 1: The SCA1<sup>+</sup> and Tcf21<sup>Lin</sup> populations are molecularly heterogeneous and expresses multiple mesenchymal progenitor markers. (A)** Gating strategy used to identify interstitial SCA1<sup>+</sup> cells in the testis. The first plot shows side scatter area and CD45 fluorescent intensity used to eliminate immune cell populations (selection of SCA1<sup>+</sup>, CD45<sup>-</sup>). The second plot is a SCA1<sup>+</sup> and cKIT<sup>+</sup> fluorescent intensity plot used to remove Leydig cells (selection of SCA1<sup>+</sup>, CD45<sup>-</sup>, cKIT<sup>-</sup>). All positive gates were determined using FMO isotype controls. **(B)** t-SNE analysis (perplexity 35,300 iterations) of thousands of cells co-stained for TCF21<sup>Lin</sup>, CD73, CD105, Thy1, CD29, and CD34 identifies five SCA1<sup>+</sup> subtypes (Clusters A-E) based on the signal intensity of various markers. **(C)** Fluorescent intensity histograms of the 6 markers for the 5 clusters defined in panel B, depicted with corresponding colors. Isotype controls for each marker are indicated with a grey shaded peaks. **(D)** Gating strategy used to characterize interstitial Tcf21<sup>Lin</sup> cells in the testis, similar to A. Note no FMO isotype control shown for Tcf21 due to genetic labeling strategy. **(E)** t-SNE analysis (perplexity 35,300 iterations) of thousands of cells co-stained for SCA1, CD73, CD105, THY1, CD29, and CD34 identifies five Tcf21<sup>Lin</sup> clusters (Clusters F-J) based on the signal intensity of various markers. **(F)** Fluorescent intensity histogram for each of 6 markers across the 5 clusters defined in panel E, depicted with corresponding colors. Isotype controls for each marker are indicated with grey shaded peaks. Data was collected from a pool of 2-3 animals. **(G)** Characterizing the overlap between the Tcf21<sup>Lin</sup> (Tdtomato) and SCA1. Data collected from a pool of 2-3 animals. **(H)** Immunofluorescence overlay of Tcf21<sup>Lin</sup> with PDGFRA<sup>eGFP</sup> (n=1), COUPTFII, CD34, and FGF5 (n=2) expression in the adult mouse testis. Scale bars: 20µm. All images were taken with the same magnification.

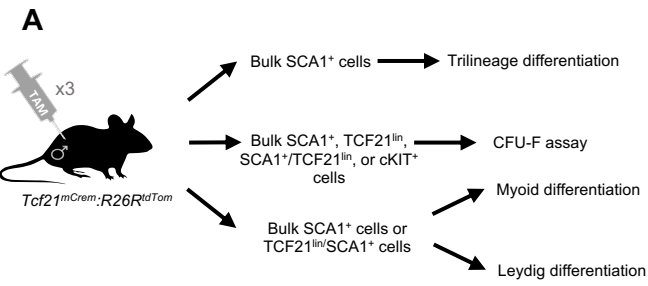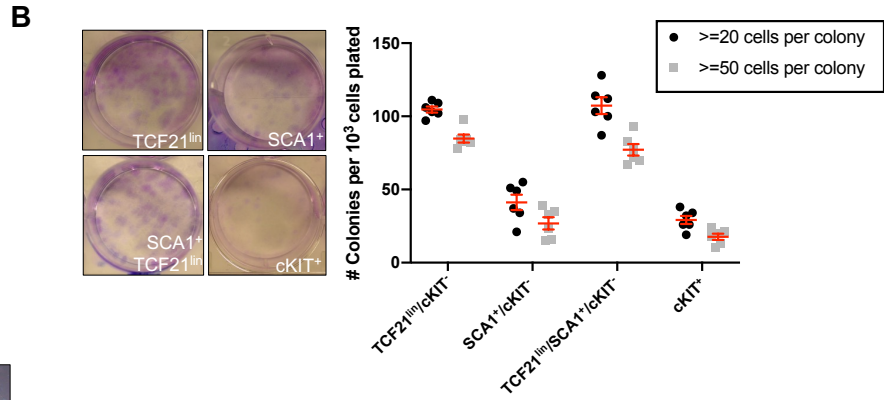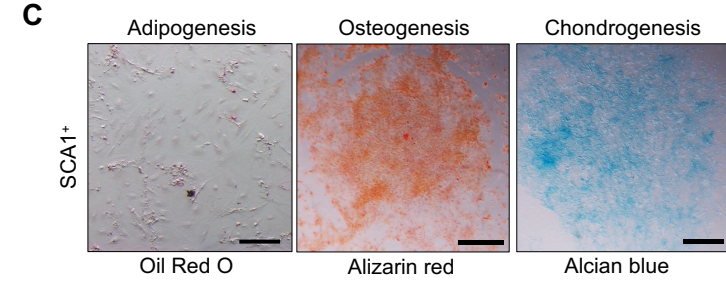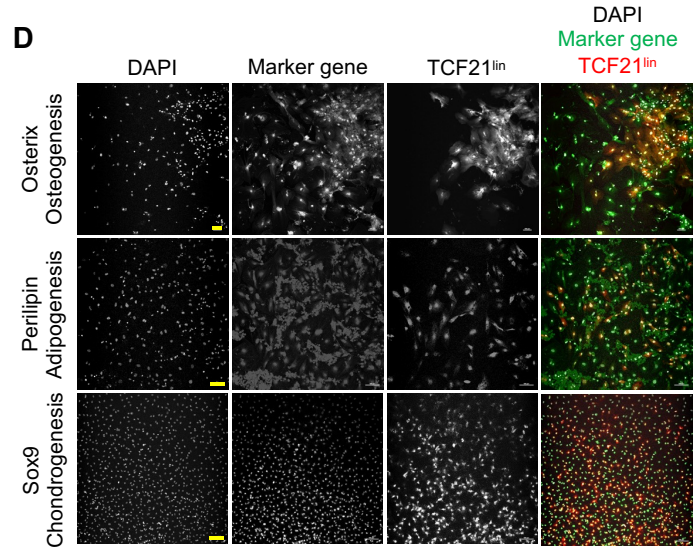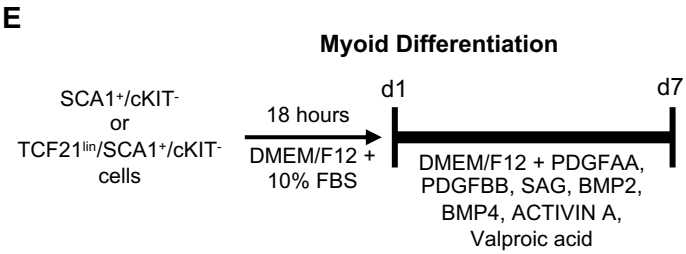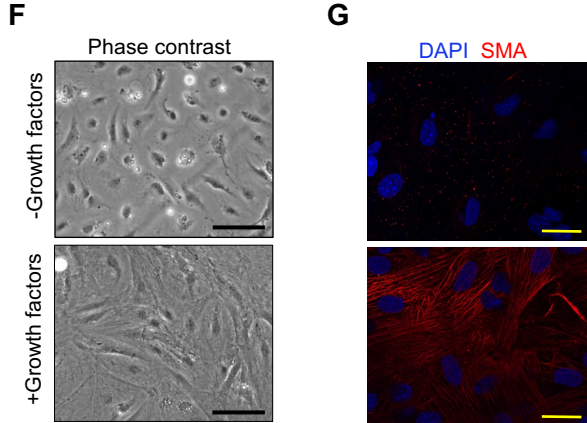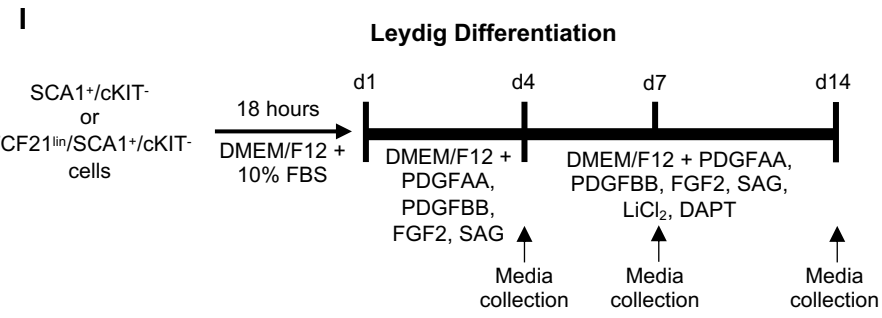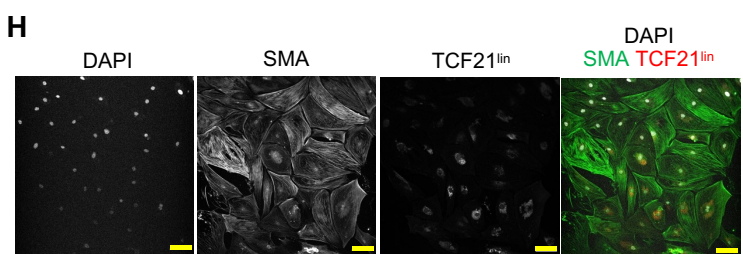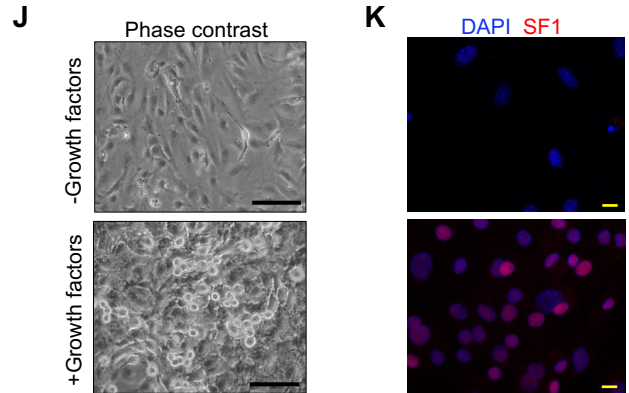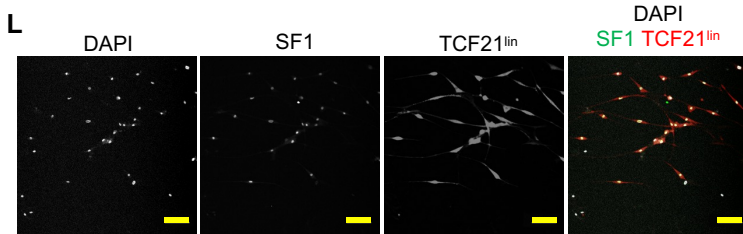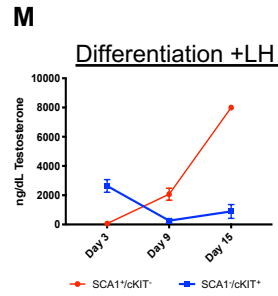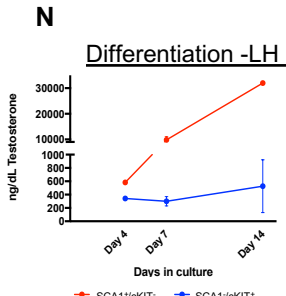



**Supplementary Figure 2: The Tcf21<sup>lin</sup> population is a mesenchymal progenitor that can be differentiated to Leydig or myoid cells.**

**(A)** Schematic representation for trilineage differentiation, CFU-F, and myoid/Leydig cell differentiation. **(B)** Enrichment of clonogenic cells in the Tcf21<sup>lin</sup> population. Left panels are CFU-F representative images and right panel is quantification of the number of colonies with either >20 or >50 cells (n=6 wells). Data are presented as mean  $\pm$  SEM. **(C)** Representative images of SCA1<sup>+</sup> trilineage differentiation. Adipogenic differentiation validated using Oil Red O, chondrogenic differentiation using Alcian blue, and osteogenic differentiation using Alizarin red. Representative images from n=4 biological replicas each with n=3 technical replicas. Scale bar: 200  $\mu$ m for adipogenesis; 1 mm for osteogenesis and chondrogenesis. **(D)** Representative images from SCA1<sup>+</sup>/Tcf21<sup>lin</sup> trilineage differentiation: Anti-Perilipin, anti-SOX9, and anti-Osterix staining is used to confirm the generation of Adipocytes, Chondrocytes, and Osteocytes respectively (n=4 wells per condition). Scale bar: 100  $\mu$ m for each row. All images in a series taken with the same magnification. **(E)** Myoid differentiation schema for bulk SCA1<sup>+</sup>/cKIT<sup>-</sup> or SCA1<sup>+</sup>/TCF21<sup>lin</sup>/cKIT<sup>-</sup> populations. **(F)** Monitoring morphological changes of SCA1<sup>+</sup>/cKIT<sup>-</sup> cells in the presence or absence of myoid differentiation cocktail via phase contrast (Scale bar: 100  $\mu$ m), **(G)** SMA expression in terminally differentiated Myoid cells with and without growth factors (Scale bar: 25  $\mu$ m). The representative images are from n= 8 biological replicates and n=3 independent experiments. **(H)** Representative images of SMA expression in SCA1<sup>+</sup>/TCF21<sup>lin</sup>/cKIT<sup>-</sup> differentiated cells. Scale bar: 100  $\mu$ m. A total of n=3 independent experiments with n=8 technical replicates were performed. **(I)** Leydig cell differentiation scheme for bulk SCA1<sup>+</sup>/cKIT<sup>-</sup> or SCA1<sup>+</sup>/TCF21<sup>lin</sup>/cKIT<sup>-</sup> populations. Cell morphology in the presence or absence of a differentiation media via phase contrast (Scale bar: 100  $\mu$ m, **J**) and expression of SF1 in SCA1<sup>+</sup> cells (**K**) or SCA1<sup>+</sup>/TCF21<sup>lin</sup>/cKIT<sup>-</sup> cells (Scale bar: 10  $\mu$ m, **L**) after 14 days of culture. Scale bar: 100  $\mu$ m. A total of n=3 independent experiments with n=8 technical replicates for **J-L**. **(M)** Media testosterone levels from SCA1<sup>+</sup>/cKIT<sup>-</sup> and cKIT<sup>+</sup>/SCA1<sup>-</sup> cells at 3 (n=6 per condition), 9, and 15 days of culture (n=4 per condition) in the presence of LH. Data are presented as mean  $\pm$  SEM. **(N)** Media testosterone levels measured from SCA1<sup>+</sup>/cKIT<sup>-</sup> and cKIT<sup>+</sup>/SCA1<sup>-</sup> cells at 4, 7, and 14 days (n=3 per condition) of culture in the absence of LH. Data are presented as mean  $\pm$  SEM.

**A**Stevant *et al.*, 2018  
Somatic cell clusters of the fetal mouse testis

|                                                  |                     | C1.Endothelial | C2.EarlyProg | C3.IntProg | C4.Pre.Sertoli | C5.FetalLeydig | C6.Sertoli |
|--------------------------------------------------|---------------------|----------------|--------------|------------|----------------|----------------|------------|
| In vitro differentiation<br>Leydig cell clusters | 1.Endothelial       | 0.49           | 0.35         | 0.39       | 0.35           | 0.35           | 0.36       |
|                                                  | 2.IntProg           | 0.42           | 0.41         | 0.56       | 0.40           | 0.46           | 0.39       |
|                                                  | 3.ProlifProg        | 0.46           | 0.54         | 0.64       | 0.39           | 0.48           | 0.45       |
|                                                  | 4.ECMmyofibroblast  | 0.46           | 0.49         | 0.58       | 0.43           | 0.45           | 0.41       |
|                                                  | 5.DiffMyofibroblast | 0.46           | 0.49         | 0.60       | 0.41           | 0.45           | 0.40       |
|                                                  | 6.DiffLeydig        | 0.43           | 0.46         | 0.61       | 0.45           | 0.53           | 0.46       |
|                                                  | 7.Leydig            | 0.39           | 0.42         | 0.55       | 0.49           | 0.58           | 0.50       |

**B**Green *et al.*, 2018  
Somatic cell clusters of the adult mouse testis

|                                                  |                     | InnateLymphoid | Macrophage | Endothelial | Myoid | Tcf21+Int | Leydig | Sertoli |
|--------------------------------------------------|---------------------|----------------|------------|-------------|-------|-----------|--------|---------|
| In vitro differentiation<br>Leydig cell clusters | 1.Endothelial       | 0.26           | 0.36       | 0.89        | 0.59  | 0.54      | 0.43   | 0.35    |
|                                                  | 2.IntProg           | 0.32           | 0.61       | 0.58        | 0.63  | 0.98      | 0.73   | 0.41    |
|                                                  | 3.ProlifProg        | 0.39           | 0.50       | 0.56        | 0.63  | 0.74      | 0.58   | 0.37    |
|                                                  | 4.ECMmyofibroblast  | 0.33           | 0.50       | 0.56        | 0.66  | 0.77      | 0.62   | 0.41    |
|                                                  | 5.DiffMyofibroblast | 0.37           | 0.53       | 0.58        | 0.67  | 0.80      | 0.61   | 0.36    |
|                                                  | 6.DiffLeydig        | 0.28           | 0.54       | 0.51        | 0.61  | 0.85      | 0.73   | 0.42    |
|                                                  | 7.Leydig            | 0.24           | 0.47       | 0.44        | 0.53  | 0.76      | 0.84   | 0.47    |

**Supplementary Figure 3: *In vitro* derived Leydig cells resemble adult Leydig cells present in vivo.** (A) Rank correlation of the seven centroids from the *in vitro* Leydig time-course differentiation with 6 cluster centroids derived from previously published Nr5a1<sup>+</sup>GFP<sup>+</sup> progenitor cells from E10.5 – E16.5 male mouse gonads<sup>33</sup>, and (B) previously published adult mouse somatic cells<sup>13</sup>.

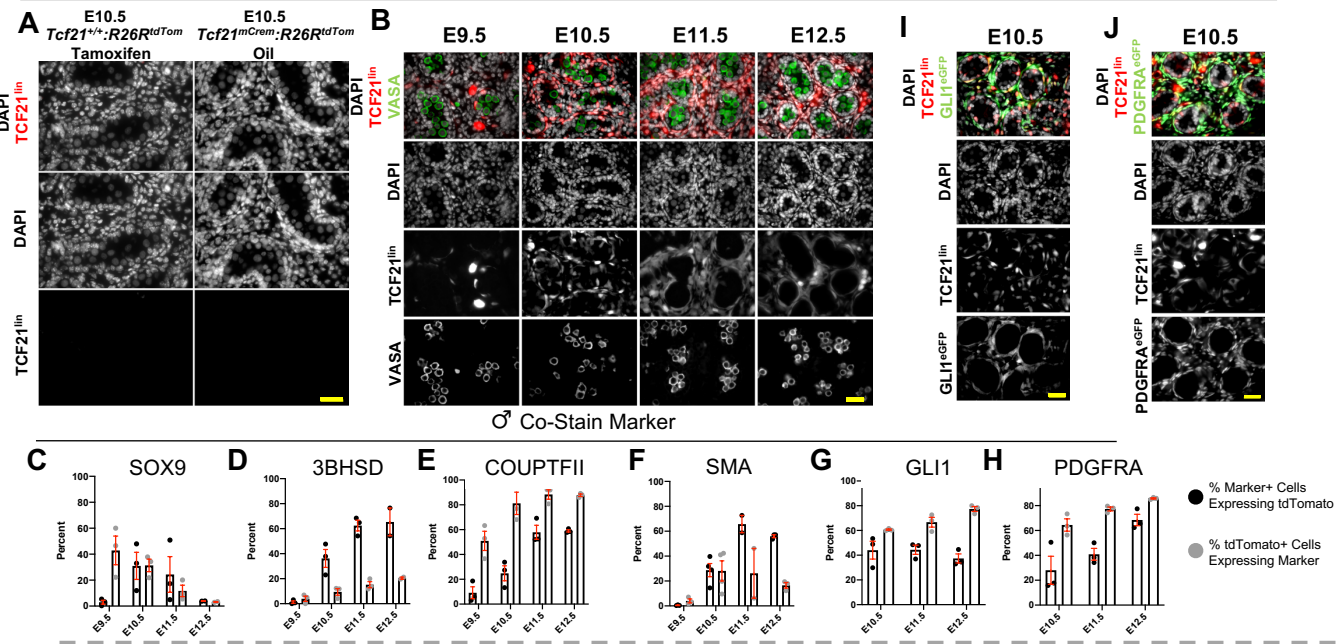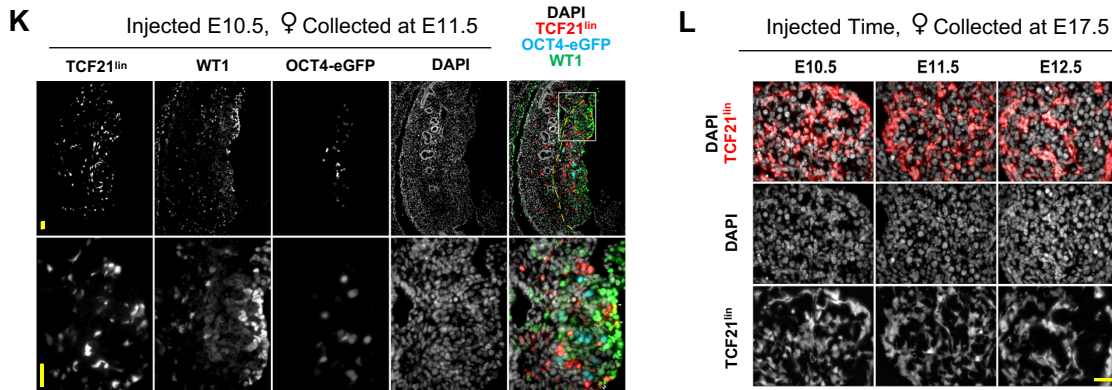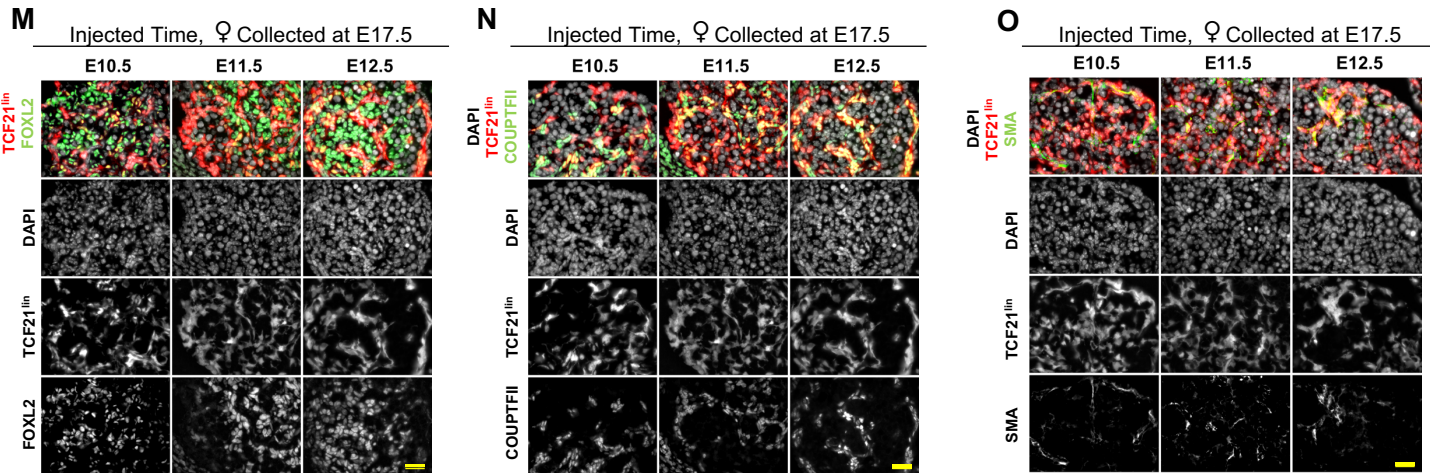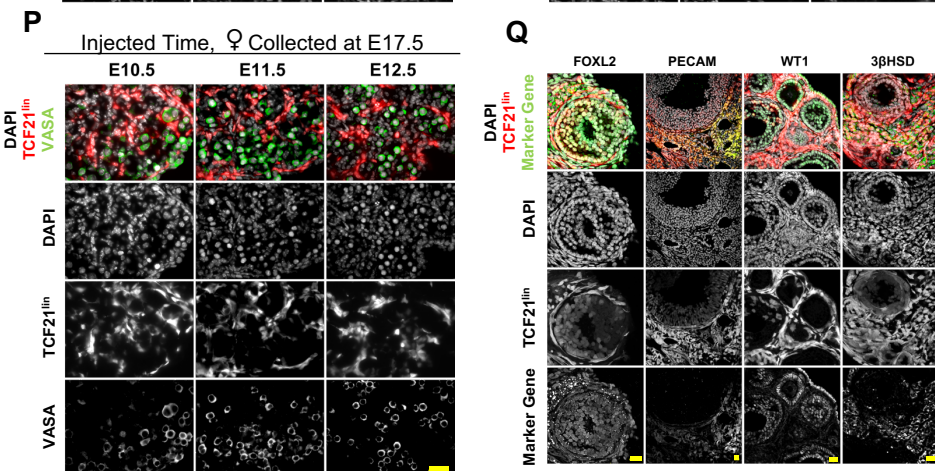

**Supplementary Figure 4: The fetal Tcf21<sup>lin</sup> population is a bipotential somatic progenitor. (A)** *Tcf21<sup>+/+</sup>:R26R<sup>tdTom</sup>* or *Tcf21<sup>mCre</sup>:R26R<sup>tdTom</sup>* time pregnant females (E10.5) were treated with Tamoxifen (left panels, n=3) or corn oil (right panels, n=3), respectively, confirming specificity and tightness of Cre expression. **(B)** Co-immunostaining of the Tcf21<sup>lin</sup> with germ cell marker Vasa (**Ddx4; green**) in the male fetal testis (collected at different injection timepoints, n=2 for E9.5, n=3 for E10.5, n=1 for E11.5, n=1 for E12.5). **(C-H)** Quantification of the percentage of various testis somatic cells co-labeled with Tcf21<sup>lin</sup> (black bars) and percentage of cells in the Tcf21<sup>lin</sup> population co-expressing testis somatic markers (gray bars) at different embryonic days (n=2-4 per timepoint per marker). Data are presented as mean ±SEM. **(I, J)** Colocalization of Tcf21<sup>lin</sup> and Gli1-egfp (**I, n=6**), PDGFRA<sup>eGFP</sup> (**J, n=7**), and the nuclear counterstain DAPI. **(K)** Tcf21<sup>lin</sup> cells in the E11.5 fetal ovary are present in the coelomic epithelium and mesonephros (n= 1 whole ovary). Overlaying Tcf21<sup>lin</sup> (Tdtom<sup>+</sup>) cells with WT1<sup>+</sup> cells (**green; L**) E10.5-E12.5 Tcf21<sup>lin</sup> cells label somatic cells broadly in the fetal ovary at E17.5 (n=12 for E10.5, n=7 for E11.5, n=6 for E12.5). **(M-P)** Overlay of the Tcf21<sup>lin</sup> with granulosa cell marker FOXL2 (**green; M, n=2-3 per timepoint**), the interstitial cell marker COUPTFII (**Nr2F2, green; N, n=2-3 per timepoint**); the smooth muscle marker SMA (**green; O, n=2-4 per timepoint**); the germ cell marker VASA (**DDX4, green; P, n=2-3 per timepoint**). **(Q)** The E10.5 fetal Tcf21<sup>lin</sup> contributes to multiple somatic cell types in the adult ovary (n=3-4 per marker). In all panels the nuclear counterstain is DAPI. Scale bars: 20 μm for all panel except **K** and **Q**. **K**: 20 μm for each row, **Q**: 20 μm for each column. All images within a panel were taken at the same magnification.



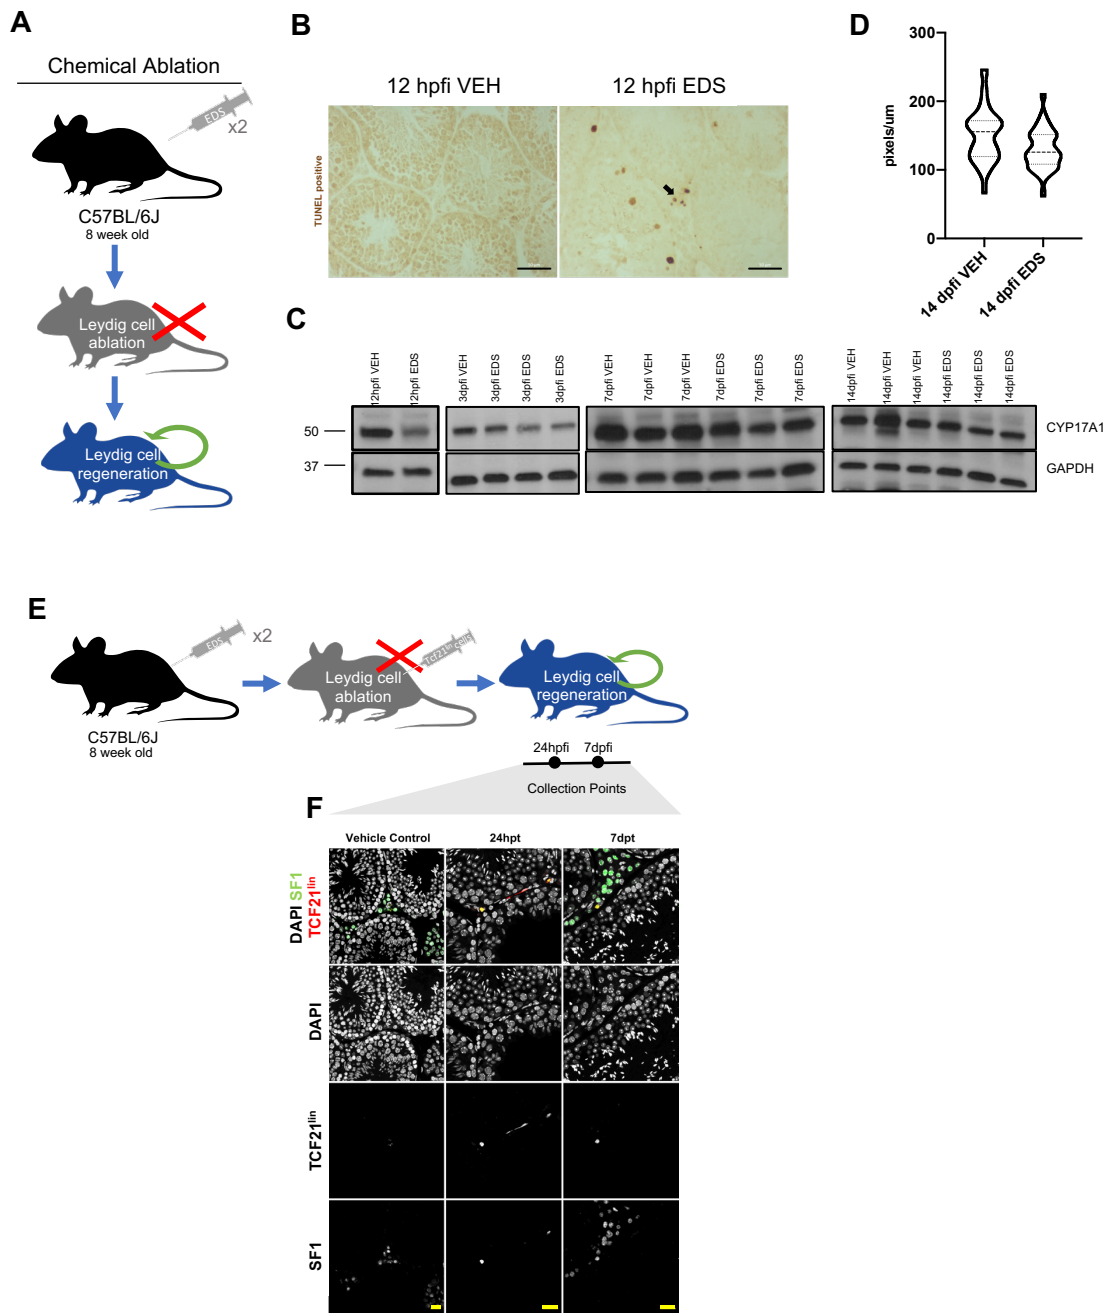

### Supplementary Figure 5: Ethane Dimethane Sulfonate (EDS) treatment ablates Leydig cells in the adult testis.

**(A)** Schematic representation of the chemical method used to ablate Leydig cells. **(B)** Representative images of apoptotic Leydig cells by TUNEL staining in adult C57BL/6 testes collected 12hpf of EDS (vehicle n=3, EDS n=4). Scale bars: 50  $\mu$ m for both panels. **(C)** Western blot illustrating Cyp17a1 protein expression levels at 12hpf, 3dpf, 7dpf, and 14dpf in C57BL/6 animals after EDS or vehicle (VEH) treatment (representative of n=3-4 per condition per timepoint). **(D)** Average Leydig cell diameter measurements 14dpf of EDS or vehicle in C57BL/6 animals, after Leydig cell recovery (n=3). Lines indicate mean and quartiles. **(E)** Schematic representation of transplantation of Tcf21<sup>lin</sup> cells following chemical ablation of Leydig cells in C57BL/6 animals. **(F)** Representative images of EDS treated C57BL/6 testes collected 24 hours and 7 days after transplant of SCA1<sup>+</sup>/cKIT<sup>-</sup> cells from Tcf21<sup>mCre</sup>:R26R<sup>tdTom</sup> animals, co-immunostained with SF1/TdTom (24 hrs n=4, 7 days n=6 per condition). Scale bars: 20  $\mu$ m for each column. All images within a column were taken with the same magnification.

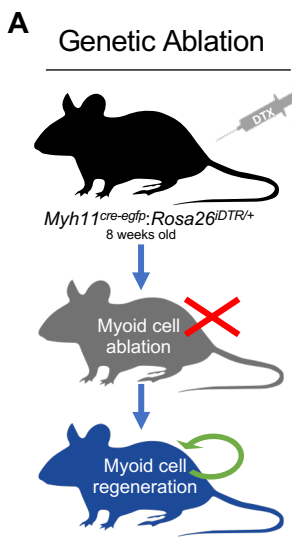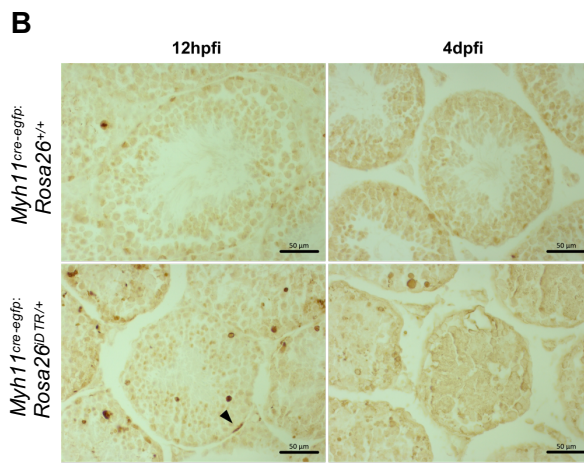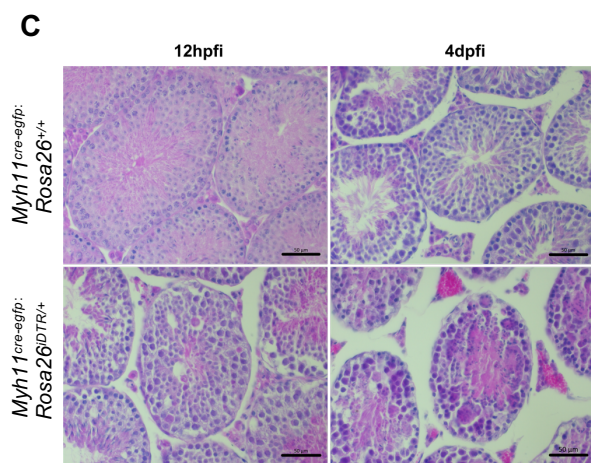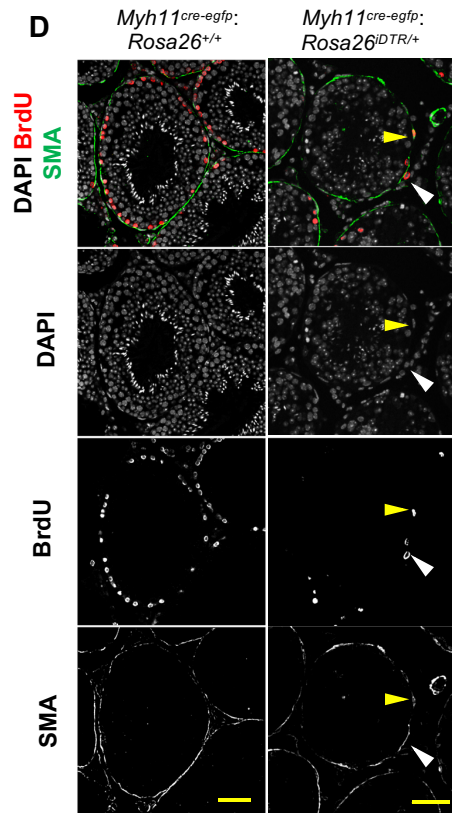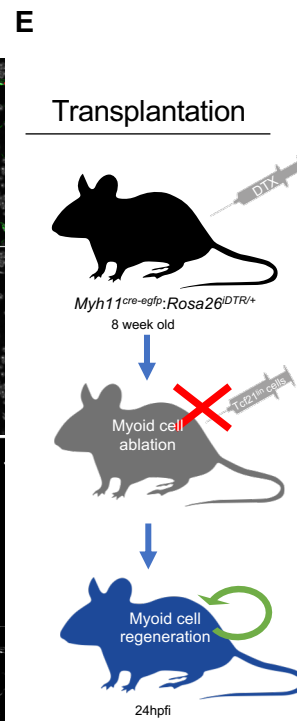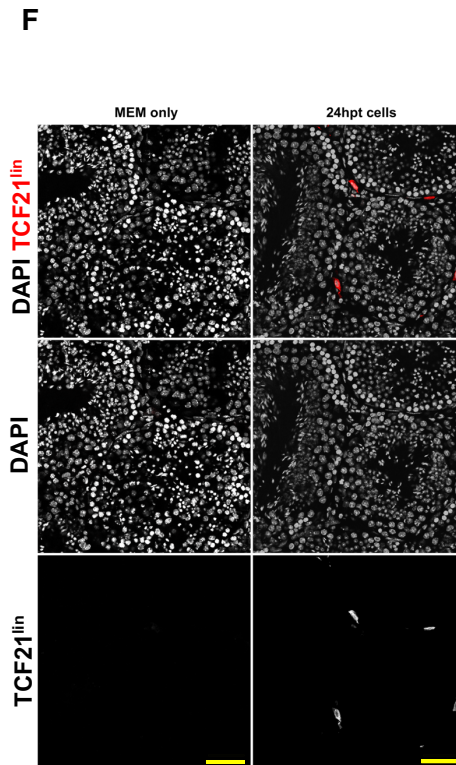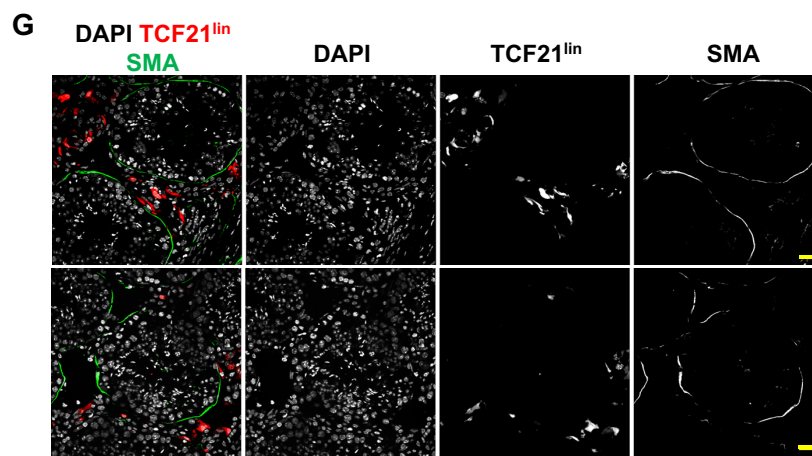

**Supplementary Figure 6: Peritubular myoid cells can regenerate after Diphtheria toxin treatment and transplanted TCF21<sup>lin</sup> cells home to the seminiferous tubule basement membrane after injury.**

**(A)** Schematic representation of the genetic method used to ablate myoid cells. **(B-E)** Efficacy of diphtheria toxin treatment on *Myh11<sup>cre-egfp</sup>:Rosa26<sup>iDTR/+</sup>* or *Myh11<sup>cre-egfp</sup>:Rosa26<sup>+/+</sup>* animals. **(B)** Representative images of apoptotic myoid cell death by TUNEL staining in testes collected 12hpf (n=4 per genotype) or 4dpfi (n=2 per genotype) of DTX. Scale bar: 50  $\mu$ m. **(C)** Representative H&E staining at 12hpf (n=3) or 4dpfi (n=2) of DTX. Scale bar: 100  $\mu$ m. **(D)** Representative images of BrdU<sup>+</sup>/SMA<sup>+</sup> (yellow arrows) or BrdU<sup>+</sup>/SMA<sup>-</sup> (white arrows) at 4dpfi in *Myh11<sup>cre-egfp</sup>:Rosa26<sup>+/+</sup>* (n=3) or *Myh11<sup>cre-egfp</sup>:Rosa26<sup>iDTR/+</sup>* (n=2) animals. Scale bar: 20  $\mu$ m. **(E)** Schematic representation of the TCF21<sup>lin</sup> cell transplant following genetic ablation of myoid cells in *Myh11<sup>cre-egfp</sup>:Rosa26<sup>iDTR/+</sup>* animals. **(F)** Representative immunofluorescence images of TCF21<sup>lin</sup> in *Myh11<sup>cre-egfp</sup>:Rosa26<sup>iDTR/+</sup>* animals at 24hpt (n=1 for MEM vehicle, n=3 for cells). **(D)** and **(F)** Scale bar: 20  $\mu$ m for each column. All images within a column were taken at the same magnification. **(G)** Two representative immunofluorescence images of TCF21<sup>lin</sup> (red) and SMA (green) in *Myh11<sup>cre-egfp</sup>:Rosa26<sup>iDTR/+</sup>* animals at 24hpt (n=3). Scale bar: 20  $\mu$ m for each row. All images within a row were taken with the same magnification.

**Supplementary Table 1.** A summary of the conversion efficiency of various TCF21<sup>lin</sup> subtypes to either myoid or Leydig cells

| Markers sorted                                                                 | No. colonies used for Leydig differentiation | No. converted to Leydig | % Conversion | No. colonies used for Myoid differentiation | No. converted to myoid | % Conversion |
|--------------------------------------------------------------------------------|----------------------------------------------|-------------------------|--------------|---------------------------------------------|------------------------|--------------|
| TCF21 <sup>lin</sup> /cKIT <sup>-</sup>                                        | 19                                           | 19                      | 100%         | 13                                          | 13                     | 100%         |
| TCF21 <sup>lin</sup> /SCA1 <sup>+</sup> /cKIT <sup>-</sup>                     | 17                                           | 17                      | 100%         | 6                                           | 6                      | 100%         |
| TCF21 <sup>lin</sup> /SCA1 <sup>+</sup> /CD105 <sup>-</sup> /cKIT <sup>-</sup> | 22                                           | 22                      | 100%         | 14                                          | 14                     | 100%         |
| TCF21 <sup>lin</sup> /SCA1 <sup>+</sup> /CD105 <sup>+</sup> /cKIT <sup>-</sup> | 12                                           | 12                      | 100%         | 6                                           | 6                      | 100%         |
