# Supplementary material for: TCF21+ mesenchymal cells contribute to testis somatic cell development, homeostasis, and regeneration in mice
Source: PubMed Central journal article supplement (PMC8222243; doi:10.1038/s41467-021-24130-8), 2021-06-23
Supplement: 41467_2021_24130_MOESM2_ESM.pdf [file 41467_2021_24130_MOESM2_ESM.pdf]

## Description of Additional Supplementary Files

### Supplementary Data 1. Markers for Somatic Cell Types (Related to Figure 1)

A. Markers for 6 Somatic Cell Types (Related to Figure 1A and 1B). A 1-sided binomial test was applied and adjustments were made for multiple comparisons.

B. Markers for 4 Somatic Cell Types (Related to Figure 1C and 1D). A 1-sided binomial test was applied and adjustments were made for multiple comparisons.

C. GO Term Enrichment for TCF21<sup>+</sup> Int Population (Related to Figure 1D). A Fisher's exact test was applied with false discovery rate correction.

### Supplementary Data 2. Markers for In-vitro Leydig Differentiation (Related to Figure 3)

A. Markers for 7 clusters of in-vitro Leydig differentiation. A 1-sided binomial test was applied and adjustments were made for multiple comparisons.

B. Gene expression centroids of 7 clusters of in-vitro Leydig differentiation.

### Supplementary Data 3. Markers for Somatic Cell Types (Related to Figure 6)

A. Interaction scores between *Tcf21*<sup>+</sup> Interstitial cells and all other somatic cells in adult mouse testis, calculated by multiplying the centroid values for each cell type from scRNAseq dataset from Green et al. Top 5% of scores are shown, others are truncated to 0.

B. Interaction scores between *Tcf21*<sup>+</sup> interstitial cells and spermatogonia, calculated in the same way as A.

### Supplementary Data 4. Primers used for mouse genotyping

A. All primers used for mouse genotyping in this study

**Supplementary Data 5.** List of primary antibodies and concentrations used.
